# Supplementary material for: Drivers of change in the realised climatic niche of terrestrial mammal species
Source: bioRxiv or medRxiv preprint supplement (doi:10.1101/2020.03.12.985374), 2020-03-12
Supplement: Supplementary file [file media-1.pdf]

**Table S1** List of species analysed (and their taxonomy).

| <b>Binomial</b>           | <b>Order</b> | <b>Family</b> |
|---------------------------|--------------|---------------|
| Echinops telfairi         | Afrosoricida | Tenrecidae    |
| Geogale aurita            | Afrosoricida | Tenrecidae    |
| Hemicentetes nigriceps    | Afrosoricida | Tenrecidae    |
| Hemicentetes semispinosus | Afrosoricida | Tenrecidae    |
| Limnogale mergulus        | Afrosoricida | Tenrecidae    |
| Microgale brevicaudata    | Afrosoricida | Tenrecidae    |
| Microgale cowani          | Afrosoricida | Tenrecidae    |
| Microgale dobsoni         | Afrosoricida | Tenrecidae    |
| Microgale drouhardi       | Afrosoricida | Tenrecidae    |
| Microgale dryas           | Afrosoricida | Tenrecidae    |
| Microgale fotsifotsy      | Afrosoricida | Tenrecidae    |
| Microgale gracilis        | Afrosoricida | Tenrecidae    |
| Microgale grandidieri     | Afrosoricida | Tenrecidae    |
| Microgale gymnorhyncha    | Afrosoricida | Tenrecidae    |
| Microgale majori          | Afrosoricida | Tenrecidae    |
| Microgale monticola       | Afrosoricida | Tenrecidae    |
| Microgale nasoloi         | Afrosoricida | Tenrecidae    |
| Microgale parvula         | Afrosoricida | Tenrecidae    |
| Microgale principula      | Afrosoricida | Tenrecidae    |
| Microgale pusilla         | Afrosoricida | Tenrecidae    |
| Microgale soricoides      | Afrosoricida | Tenrecidae    |
| Microgale taiva           | Afrosoricida | Tenrecidae    |
| Microgale talazaci        | Afrosoricida | Tenrecidae    |
| Microgale thomasi         | Afrosoricida | Tenrecidae    |
| Oryzorictes hova          | Afrosoricida | Tenrecidae    |
| Ailurus fulgens           | Carnivora    | Ailuridae     |
| Canis latrans             | Carnivora    | Canidae       |
| Canis lupus               | Carnivora    | Canidae       |
| Canis mesomelas           | Carnivora    | Canidae       |
| Canis rufus               | Carnivora    | Canidae       |
| Canis simensis            | Carnivora    | Canidae       |
| Cuon alpinus              | Carnivora    | Canidae       |
| Dusicyon australis        | Carnivora    | Canidae       |
| Lycaon pictus             | Carnivora    | Canidae       |
| Vulpes velox              | Carnivora    | Canidae       |
| Vulpes vulpes             | Carnivora    | Canidae       |
| Cryptoprocta ferox        | Carnivora    | Eupleridae    |
| Cryptoprocta spelea       | Carnivora    | Eupleridae    |
| Eupleres goudotii         | Carnivora    | Eupleridae    |
| Eupleres major            | Carnivora    | Eupleridae    |
| Fossa fossana             | Carnivora    | Eupleridae    |
| Galidia elegans           | Carnivora    | Eupleridae    |
| Galidictis fasciata       | Carnivora    | Eupleridae    |
| Mungotictis decemlineata  | Carnivora    | Eupleridae    |
| Salanoia concolor         | Carnivora    | Eupleridae    |

|                                 |           |            |
|---------------------------------|-----------|------------|
| <i>Acinonyx jubatus</i>         | Carnivora | Felidae    |
| <i>Caracal aurata</i>           | Carnivora | Felidae    |
| <i>Caracal caracal</i>          | Carnivora | Felidae    |
| <i>Catopuma badia</i>           | Carnivora | Felidae    |
| <i>Catopuma temminckii</i>      | Carnivora | Felidae    |
| <i>Felis chaus</i>              | Carnivora | Felidae    |
| <i>Felis margarita</i>          | Carnivora | Felidae    |
| <i>Felis silvestris</i>         | Carnivora | Felidae    |
| <i>Herpailurus yagouaroundi</i> | Carnivora | Felidae    |
| <i>Leopardus pardalis</i>       | Carnivora | Felidae    |
| <i>Leptailurus serval</i>       | Carnivora | Felidae    |
| <i>Lynx canadensis</i>          | Carnivora | Felidae    |
| <i>Lynx lynx</i>                | Carnivora | Felidae    |
| <i>Lynx pardinus</i>            | Carnivora | Felidae    |
| <i>Lynx rufus</i>               | Carnivora | Felidae    |
| <i>Neofelis diardi</i>          | Carnivora | Felidae    |
| <i>Neofelis nebulosa</i>        | Carnivora | Felidae    |
| <i>Panthera leo</i>             | Carnivora | Felidae    |
| <i>Panthera onca</i>            | Carnivora | Felidae    |
| <i>Panthera pardus</i>          | Carnivora | Felidae    |
| <i>Panthera tigris</i>          | Carnivora | Felidae    |
| <i>Pardofelis marmorata</i>     | Carnivora | Felidae    |
| <i>Prionailurus viverrinus</i>  | Carnivora | Felidae    |
| <i>Puma concolor</i>            | Carnivora | Felidae    |
| <i>Crocuta crocuta</i>          | Carnivora | Hyaenidae  |
| <i>Hyaena hyaena</i>            | Carnivora | Hyaenidae  |
| <i>Parahyaena brunnea</i>       | Carnivora | Hyaenidae  |
| <i>Proteles cristata</i>        | Carnivora | Hyaenidae  |
| <i>Enhydra lutris</i>           | Carnivora | Mustelidae |
| <i>Gulo gulo</i>                | Carnivora | Mustelidae |
| <i>Lontra canadensis</i>        | Carnivora | Mustelidae |
| <i>Lutra lutra</i>              | Carnivora | Mustelidae |
| <i>Lutra sumatrana</i>          | Carnivora | Mustelidae |
| <i>Martes americana</i>         | Carnivora | Mustelidae |
| <i>Martes gwatkinsii</i>        | Carnivora | Mustelidae |
| <i>Martes martes</i>            | Carnivora | Mustelidae |
| <i>Martes melampus</i>          | Carnivora | Mustelidae |
| <i>Martes pennanti</i>          | Carnivora | Mustelidae |
| <i>Martes zibellina</i>         | Carnivora | Mustelidae |
| <i>Melogale everetti</i>        | Carnivora | Mustelidae |
| <i>Mustela lutreola</i>         | Carnivora | Mustelidae |
| <i>Mustela lutreolina</i>       | Carnivora | Mustelidae |
| <i>Mustela nivalis</i>          | Carnivora | Mustelidae |
| <i>Neovison macrodon</i>        | Carnivora | Mustelidae |
| <i>Neovison vison</i>           | Carnivora | Mustelidae |
| <i>Phocarcos hookeri</i>        | Carnivora | Otariidae  |
| <i>Zalophus japonicus</i>       | Carnivora | Otariidae  |
| <i>Monachus monachus</i>        | Carnivora | Phocidae   |
| <i>Neomonachus tropicalis</i>   | Carnivora | Phocidae   |

|                                     |                 |                |
|-------------------------------------|-----------------|----------------|
| <i>Pagophilus groenlandicus</i>     | Carnivora       | Phocidae       |
| <i>Prionodon linsang</i>            | Carnivora       | Prionodontidae |
| <i>Ailuropoda melanoleuca</i>       | Carnivora       | Ursidae        |
| <i>Tremarctos ornatus</i>           | Carnivora       | Ursidae        |
| <i>Ursus americanus</i>             | Carnivora       | Ursidae        |
| <i>Ursus arctos</i>                 | Carnivora       | Ursidae        |
| <i>Genetta piscivora</i>            | Carnivora       | Viverridae     |
| <i>Macrogalidia musschenbroekii</i> | Carnivora       | Viverridae     |
| <i>Poiana leightoni</i>             | Carnivora       | Viverridae     |
| <i>Viverra megaspila</i>            | Carnivora       | Viverridae     |
| <i>Antilocapra americana</i>        | Cetartiodactyla | Antilocapridae |
| <i>Addax nasomaculatus</i>          | Cetartiodactyla | Bovidae        |
| <i>Alcelaphus buselaphus</i>        | Cetartiodactyla | Bovidae        |
| <i>Ammodorcas clarkei</i>           | Cetartiodactyla | Bovidae        |
| <i>Ammotragus lervia</i>            | Cetartiodactyla | Bovidae        |
| <i>Antilope cervicapra</i>          | Cetartiodactyla | Bovidae        |
| <i>Beatragus hunteri</i>            | Cetartiodactyla | Bovidae        |
| <i>Bison bison</i>                  | Cetartiodactyla | Bovidae        |
| <i>Bison bonasus</i>                | Cetartiodactyla | Bovidae        |
| <i>Bos gaurus</i>                   | Cetartiodactyla | Bovidae        |
| <i>Bos javanicus</i>                | Cetartiodactyla | Bovidae        |
| <i>Bos mutus</i>                    | Cetartiodactyla | Bovidae        |
| <i>Bos primigenius</i>              | Cetartiodactyla | Bovidae        |
| <i>Boselaphus tragocamelus</i>      | Cetartiodactyla | Bovidae        |
| <i>Bubalus arnee</i>                | Cetartiodactyla | Bovidae        |
| <i>Bubalus depressicornis</i>       | Cetartiodactyla | Bovidae        |
| <i>Bubalus mindorensis</i>          | Cetartiodactyla | Bovidae        |
| <i>Capra aegagrus</i>               | Cetartiodactyla | Bovidae        |
| <i>Capra falconeri</i>              | Cetartiodactyla | Bovidae        |
| <i>Capra ibex</i>                   | Cetartiodactyla | Bovidae        |
| <i>Capra nubiana</i>                | Cetartiodactyla | Bovidae        |
| <i>Capra pyrenaica</i>              | Cetartiodactyla | Bovidae        |
| <i>Capricornis swinhoei</i>         | Cetartiodactyla | Bovidae        |
| <i>Cephalophus zebra</i>            | Cetartiodactyla | Bovidae        |
| <i>Damaliscus lunatus</i>           | Cetartiodactyla | Bovidae        |
| <i>Eudorcas rufifrons</i>           | Cetartiodactyla | Bovidae        |
| <i>Gazella bilkis</i>               | Cetartiodactyla | Bovidae        |
| <i>Gazella dorcas</i>               | Cetartiodactyla | Bovidae        |
| <i>Gazella gazella</i>              | Cetartiodactyla | Bovidae        |
| <i>Gazella saudiya</i>              | Cetartiodactyla | Bovidae        |
| <i>Hippotragus equinus</i>          | Cetartiodactyla | Bovidae        |
| <i>Hippotragus leucophaeus</i>      | Cetartiodactyla | Bovidae        |
| <i>Naemorhedus caudatus</i>         | Cetartiodactyla | Bovidae        |
| <i>Nanger dama</i>                  | Cetartiodactyla | Bovidae        |
| <i>Nanger soemmerringii</i>         | Cetartiodactyla | Bovidae        |
| <i>Nilgiritragus hylocrius</i>      | Cetartiodactyla | Bovidae        |
| <i>Oreamnos americanus</i>          | Cetartiodactyla | Bovidae        |
| <i>Oryx beisa</i>                   | Cetartiodactyla | Bovidae        |
| <i>Oryx dammah</i>                  | Cetartiodactyla | Bovidae        |

|                                      |                 |                |
|--------------------------------------|-----------------|----------------|
| <i>Oryx leucoryx</i>                 | Cetartiodactyla | Bovidae        |
| <i>Ovibos moschatus</i>              | Cetartiodactyla | Bovidae        |
| <i>Ovis ammon</i>                    | Cetartiodactyla | Bovidae        |
| <i>Ovis canadensis</i>               | Cetartiodactyla | Bovidae        |
| <i>Ovis orientalis</i>               | Cetartiodactyla | Bovidae        |
| <i>Pantholops hodgsonii</i>          | Cetartiodactyla | Bovidae        |
| <i>Procapra przewalskii</i>          | Cetartiodactyla | Bovidae        |
| <i>Pseudoryx nghetinhensis</i>       | Cetartiodactyla | Bovidae        |
| <i>Raphicerus campestris</i>         | Cetartiodactyla | Bovidae        |
| <i>Rupicapra pyrenaica</i>           | Cetartiodactyla | Bovidae        |
| <i>Saiga tatarica</i>                | Cetartiodactyla | Bovidae        |
| <i>Syncerus caffer</i>               | Cetartiodactyla | Bovidae        |
| <i>Tragelaphus derbianus</i>         | Cetartiodactyla | Bovidae        |
| <i>Camelus ferus</i>                 | Cetartiodactyla | Camelidae      |
| <i>Alces alces</i>                   | Cetartiodactyla | Cervidae       |
| <i>Axis axis</i>                     | Cetartiodactyla | Cervidae       |
| <i>Axis kuhlii</i>                   | Cetartiodactyla | Cervidae       |
| <i>Axis porcinus</i>                 | Cetartiodactyla | Cervidae       |
| <i>Cervus canadensis</i>             | Cetartiodactyla | Cervidae       |
| <i>Cervus elaphus</i>                | Cetartiodactyla | Cervidae       |
| <i>Cervus nippon</i>                 | Cetartiodactyla | Cervidae       |
| <i>Dama dama</i>                     | Cetartiodactyla | Cervidae       |
| <i>Dama mesopotamica</i>             | Cetartiodactyla | Cervidae       |
| <i>Elaphurus davidianus</i>          | Cetartiodactyla | Cervidae       |
| <i>Hippocamelus antisensis</i>       | Cetartiodactyla | Cervidae       |
| <i>Hippocamelus bisulcus</i>         | Cetartiodactyla | Cervidae       |
| <i>Hydropotes inermis</i>            | Cetartiodactyla | Cervidae       |
| <i>Muntiacus crinifrons</i>          | Cetartiodactyla | Cervidae       |
| <i>Odocoileus hemionus</i>           | Cetartiodactyla | Cervidae       |
| <i>Ozotoceros bezoarticus</i>        | Cetartiodactyla | Cervidae       |
| <i>Rangifer tarandus</i>             | Cetartiodactyla | Cervidae       |
| <i>Rucervus duvaucelii</i>           | Cetartiodactyla | Cervidae       |
| <i>Rucervus eldii</i>                | Cetartiodactyla | Cervidae       |
| <i>Rucervus schomburgki</i>          | Cetartiodactyla | Cervidae       |
| <i>Rusa alfredi</i>                  | Cetartiodactyla | Cervidae       |
| <i>Rusa marianna</i>                 | Cetartiodactyla | Cervidae       |
| <i>Rusa timorensis</i>               | Cetartiodactyla | Cervidae       |
| <i>Giraffa camelopardalis</i>        | Cetartiodactyla | Giraffidae     |
| <i>Hippopotamus amphibius</i>        | Cetartiodactyla | Hippopotamidae |
| <i>Hippopotamus lemerlei</i>         | Cetartiodactyla | Hippopotamidae |
| <i>Hippopotamus madagascariensis</i> | Cetartiodactyla | Hippopotamidae |
| <i>Porcula salvania</i>              | Cetartiodactyla | Suidae         |
| <i>Sus barbatus</i>                  | Cetartiodactyla | Suidae         |
| <i>Sus bucculentus</i>               | Cetartiodactyla | Suidae         |
| <i>Sus cebifrons</i>                 | Cetartiodactyla | Suidae         |
| <i>Sus oliveri</i>                   | Cetartiodactyla | Suidae         |
| <i>Sus philippensis</i>              | Cetartiodactyla | Suidae         |
| <i>Sus scrofa</i>                    | Cetartiodactyla | Suidae         |

|                                  |                 |                  |
|----------------------------------|-----------------|------------------|
| <i>Sus verrucosus</i>            | Cetartiodactyla | Suidae           |
| <i>Catagonus wagneri</i>         | Cetartiodactyla | Tayassuidae      |
| <i>Taphozous hildegardeae</i>    | Chiroptera      | Emballonuridae   |
| <i>Hipposideros grandis</i>      | Chiroptera      | Hipposideridae   |
| <i>Hipposideros inornatus</i>    | Chiroptera      | Hipposideridae   |
| <i>Hipposideros orbiculus</i>    | Chiroptera      | Hipposideridae   |
| <i>Hipposideros ridleyi</i>      | Chiroptera      | Hipposideridae   |
| <i>Macroderma gigas</i>          | Chiroptera      | Megadermatidae   |
| <i>Chaerephon bregullae</i>      | Chiroptera      | Molossidae       |
| <i>Chaerephon johorensis</i>     | Chiroptera      | Molossidae       |
| <i>Eumops floridanus</i>         | Chiroptera      | Molossidae       |
| <i>Mormopterus acetabulosus</i>  | Chiroptera      | Molossidae       |
| <i>Mormopterus minutus</i>       | Chiroptera      | Molossidae       |
| <i>Mystacina robusta</i>         | Chiroptera      | Mystacinidae     |
| <i>Mystacina tuberculata</i>     | Chiroptera      | Mystacinidae     |
| <i>Natalus primus</i>            | Chiroptera      | Natalidae        |
| <i>Nycteris javanica</i>         | Chiroptera      | Nycteridae       |
| <i>Vampyressa melissa</i>        | Chiroptera      | Phyllostomidae   |
| <i>Acerodon jubatus</i>          | Chiroptera      | Pteropodidae     |
| <i>Aproteles bulmerae</i>        | Chiroptera      | Pteropodidae     |
| <i>Dobsonia chapmani</i>         | Chiroptera      | Pteropodidae     |
| <i>Dobsonia emersa</i>           | Chiroptera      | Pteropodidae     |
| <i>Megaerops wetmorei</i>        | Chiroptera      | Pteropodidae     |
| <i>Mirimiri acrodonta</i>        | Chiroptera      | Pteropodidae     |
| <i>Pteralopex anceps</i>         | Chiroptera      | Pteropodidae     |
| <i>Pteropus fundatus</i>         | Chiroptera      | Pteropodidae     |
| <i>Pteropus pilosus</i>          | Chiroptera      | Pteropodidae     |
| <i>Pteropus poliocephalus</i>    | Chiroptera      | Pteropodidae     |
| <i>Pteropus rodricensis</i>      | Chiroptera      | Pteropodidae     |
| <i>Pteropus subniger</i>         | Chiroptera      | Pteropodidae     |
| <i>Pteropus tokudae</i>          | Chiroptera      | Pteropodidae     |
| <i>Rhinolophus maclaudi</i>      | Chiroptera      | Rhinolophidae    |
| <i>Rhinolophus mehelyi</i>       | Chiroptera      | Rhinolophidae    |
| <i>Rhinolophus montanus</i>      | Chiroptera      | Rhinolophidae    |
| <i>Chalinolobus tuberculatus</i> | Chiroptera      | Vespertilionidae |
| <i>Eptesicus diminutus</i>       | Chiroptera      | Vespertilionidae |
| <i>Eptesicus japonensis</i>      | Chiroptera      | Vespertilionidae |
| <i>Hesperoptenus tomesi</i>      | Chiroptera      | Vespertilionidae |
| <i>Murina ryukyuana</i>          | Chiroptera      | Vespertilionidae |
| <i>Murina tenebrosa</i>          | Chiroptera      | Vespertilionidae |
| <i>Myotis capaccinii</i>         | Chiroptera      | Vespertilionidae |
| <i>Myotis pruinus</i>            | Chiroptera      | Vespertilionidae |
| <i>Myotis vivesi</i>             | Chiroptera      | Vespertilionidae |
| <i>Myotis yanbarensis</i>        | Chiroptera      | Vespertilionidae |
| <i>Nyctalus furvus</i>           | Chiroptera      | Vespertilionidae |
| <i>Nyctophilus nebulosus</i>     | Chiroptera      | Vespertilionidae |
| <i>Pipistrellus endoi</i>        | Chiroptera      | Vespertilionidae |
| <i>Dasyopus novemcinctus</i>     | Cingulata       | CingulataFam     |
| <i>Dasyercus blythi</i>          | Dasyuromorphia  | Dasyuridae       |

|                                  |                 |                 |
|----------------------------------|-----------------|-----------------|
| <i>Dasyercus cristicauda</i>     | Dasyuromorphia  | Dasyuridae      |
| <i>Dasyuroides byrnei</i>        | Dasyuromorphia  | Dasyuridae      |
| <i>Dasyurus geoffroii</i>        | Dasyuromorphia  | Dasyuridae      |
| <i>Dasyurus hallucatus</i>       | Dasyuromorphia  | Dasyuridae      |
| <i>Dasyurus maculatus</i>        | Dasyuromorphia  | Dasyuridae      |
| <i>Parantechinus apicalis</i>    | Dasyuromorphia  | Dasyuridae      |
| <i>Phascogale calura</i>         | Dasyuromorphia  | Dasyuridae      |
| <i>Phascogale pirata</i>         | Dasyuromorphia  | Dasyuridae      |
| <i>Phascogale tapoatafa</i>      | Dasyuromorphia  | Dasyuridae      |
| <i>Pseudantechinus mimulus</i>   | Dasyuromorphia  | Dasyuridae      |
| <i>Sarcophilus harrisi</i>       | Dasyuromorphia  | Dasyuridae      |
| <i>Sminthopsis gilberti</i>      | Dasyuromorphia  | Dasyuridae      |
| <i>Sminthopsis psammophila</i>   | Dasyuromorphia  | Dasyuridae      |
| <i>Myrmecobius fasciatus</i>     | Dasyuromorphia  | Myrmecobiidae   |
| <i>Thylacinus cynocephalus</i>   | Dasyuromorphia  | Thylacinidae    |
| <i>Chacodelphys formosa</i>      | Didelphimorphia | Didelphidae     |
| <i>Cryptonanus ignitus</i>       | Didelphimorphia | Didelphidae     |
| <i>Marmosops handleyi</i>        | Didelphimorphia | Didelphidae     |
| <i>Acrobates pygmaeus</i>        | Diprotodontia   | Acrobatidae     |
| <i>Dendrolagus goodfellowi</i>   | Diprotodontia   | Macropodidae    |
| <i>Dendrolagus inustus</i>       | Diprotodontia   | Macropodidae    |
| <i>Dendrolagus matschiei</i>     | Diprotodontia   | Macropodidae    |
| <i>Dendrolagus spadix</i>        | Diprotodontia   | Macropodidae    |
| <i>Dendrolagus ursinus</i>       | Diprotodontia   | Macropodidae    |
| <i>Dorcopsis luctuosa</i>        | Diprotodontia   | Macropodidae    |
| <i>Lagorchestes asomatus</i>     | Diprotodontia   | Macropodidae    |
| <i>Lagorchestes hirsutus</i>     | Diprotodontia   | Macropodidae    |
| <i>Lagorchestes leporides</i>    | Diprotodontia   | Macropodidae    |
| <i>Lagostrophus fasciatus</i>    | Diprotodontia   | Macropodidae    |
| <i>Macropus eugenii</i>          | Diprotodontia   | Macropodidae    |
| <i>Macropus greyi</i>            | Diprotodontia   | Macropodidae    |
| <i>Macropus parryi</i>           | Diprotodontia   | Macropodidae    |
| <i>Onychogalea fraenata</i>      | Diprotodontia   | Macropodidae    |
| <i>Onychogalea lunata</i>        | Diprotodontia   | Macropodidae    |
| <i>Petrogale lateralis</i>       | Diprotodontia   | Macropodidae    |
| <i>Petrogale xanthopus</i>       | Diprotodontia   | Macropodidae    |
| <i>Setonix brachyurus</i>        | Diprotodontia   | Macropodidae    |
| <i>Thylogale billardieri</i>     | Diprotodontia   | Macropodidae    |
| <i>Thylogale brunii</i>          | Diprotodontia   | Macropodidae    |
| <i>Thylogale calabyi</i>         | Diprotodontia   | Macropodidae    |
| <i>Gymnobelideus leadbeateri</i> | Diprotodontia   | Petauridae      |
| <i>Petaurus australis</i>        | Diprotodontia   | Petauridae      |
| <i>Trichosurus vulpecula</i>     | Diprotodontia   | Phalangeridae   |
| <i>Phascolarctos cinereus</i>    | Diprotodontia   | Phascolarctidae |
| <i>Aepyprymnus rufescens</i>     | Diprotodontia   | Potoroidae      |
| <i>Bettongia anhydra</i>         | Diprotodontia   | Potoroidae      |
| <i>Bettongia gaimardi</i>        | Diprotodontia   | Potoroidae      |
| <i>Bettongia lesueur</i>         | Diprotodontia   | Potoroidae      |
| <i>Bettongia penicillata</i>     | Diprotodontia   | Potoroidae      |

|                                   |                  |                 |
|-----------------------------------|------------------|-----------------|
| <i>Bettongia pusilla</i>          | Diprotodontia    | Potoroidae      |
| <i>Bettongia tropica</i>          | Diprotodontia    | Potoroidae      |
| <i>Caloprymnus campestris</i>     | Diprotodontia    | Potoroidae      |
| <i>Potorous gilbertii</i>         | Diprotodontia    | Potoroidae      |
| <i>Potorous platyops</i>          | Diprotodontia    | Potoroidae      |
| <i>Pseudocheirus occidentalis</i> | Diprotodontia    | Pseudocheiridae |
| <i>Pseudocheirus peregrinus</i>   | Diprotodontia    | Pseudocheiridae |
| <i>Pseudochirulus schlegeli</i>   | Diprotodontia    | Pseudocheiridae |
| <i>Lasiorhinus krefftii</i>       | Diprotodontia    | Vombatidae      |
| <i>Lasiorhinus latifrons</i>      | Diprotodontia    | Vombatidae      |
| <i>Neohylomys hainanensis</i>     | Eulipotyphla     | Erinaceidae     |
| <i>Nesophontes edithae</i>        | Eulipotyphla     | Nesophontidae   |
| <i>Nesophontes hypomicrus</i>     | Eulipotyphla     | Nesophontidae   |
| <i>Nesophontes major</i>          | Eulipotyphla     | Nesophontidae   |
| <i>Nesophontes micrus</i>         | Eulipotyphla     | Nesophontidae   |
| <i>Nesophontes paramicrus</i>     | Eulipotyphla     | Nesophontidae   |
| <i>Nesophontes zamicus</i>        | Eulipotyphla     | Nesophontidae   |
| <i>Solenodon cubanus</i>          | Eulipotyphla     | Solenodontidae  |
| <i>Solenodon marcanoi</i>         | Eulipotyphla     | Solenodontidae  |
| <i>Solenodon paradoxus</i>        | Eulipotyphla     | Solenodontidae  |
| <i>Crocidura andamanensis</i>     | Eulipotyphla     | Soricidae       |
| <i>Crocidura baileyi</i>          | Eulipotyphla     | Soricidae       |
| <i>Crocidura desperata</i>        | Eulipotyphla     | Soricidae       |
| <i>Crocidura hispida</i>          | Eulipotyphla     | Soricidae       |
| <i>Crocidura jenkinsi</i>         | Eulipotyphla     | Soricidae       |
| <i>Crocidura miya</i>             | Eulipotyphla     | Soricidae       |
| <i>Crocidura pachyura</i>         | Eulipotyphla     | Soricidae       |
| <i>Crocidura stenocephala</i>     | Eulipotyphla     | Soricidae       |
| <i>Crocidura suaveolens</i>       | Eulipotyphla     | Soricidae       |
| <i>Crocidura tarella</i>          | Eulipotyphla     | Soricidae       |
| <i>Crocidura telfordi</i>         | Eulipotyphla     | Soricidae       |
| <i>Crocidura virgata</i>          | Eulipotyphla     | Soricidae       |
| <i>Cryptotis obscura</i>          | Eulipotyphla     | Soricidae       |
| <i>Sorex sclateri</i>             | Eulipotyphla     | Soricidae       |
| <i>Suncus mertensi</i>            | Eulipotyphla     | Soricidae       |
| <i>Sylvisorex camerunensis</i>    | Eulipotyphla     | Soricidae       |
| <i>Desmana moschata</i>           | Eulipotyphla     | Talpidae        |
| <i>Lepus corsicanus</i>           | Lagomorpha       | Leporidae       |
| <i>Lepus europaeus</i>            | Lagomorpha       | Leporidae       |
| <i>Lepus flavigularis</i>         | Lagomorpha       | Leporidae       |
| <i>Oryctolagus cuniculus</i>      | Lagomorpha       | Leporidae       |
| <i>Sylvilagus transitionalis</i>  | Lagomorpha       | Leporidae       |
| <i>Ochotona hoffmanni</i>         | Lagomorpha       | Ochotonidae     |
| <i>Prolagus sardus</i>            | Lagomorpha       | Prolagidae      |
| <i>Rhynchocyon chrysopygus</i>    | Macroscelidea    | Macroscelididae |
| <i>Zaglossus bartoni</i>          | Monotremata      | Tachyglossidae  |
| <i>Zaglossus bruijnii</i>         | Monotremata      | Tachyglossidae  |
| <i>Caenolestes convelatus</i>     | Paucituberculata | Caenolestidae   |
| <i>Caenolestes sangay</i>         | Paucituberculata | Caenolestidae   |

|                                  |                 |                 |
|----------------------------------|-----------------|-----------------|
| <i>Chaeropus ecaudatus</i>       | Peramelemorphia | Chaeropodidae   |
| <i>Isoodon auratus</i>           | Peramelemorphia | Peramelidae     |
| <i>Isoodon obesulus</i>          | Peramelemorphia | Peramelidae     |
| <i>Perameles bougainville</i>    | Peramelemorphia | Peramelidae     |
| <i>Perameles eremiana</i>        | Peramelemorphia | Peramelidae     |
| <i>Perameles gunnii</i>          | Peramelemorphia | Peramelidae     |
| <i>Rhynchomeles prattorum</i>    | Peramelemorphia | Peramelidae     |
| <i>Macrotis lagotis</i>          | Peramelemorphia | Thylacomyidae   |
| <i>Macrotis leucura</i>          | Peramelemorphia | Thylacomyidae   |
| <i>Equus africanus</i>           | Perissodactyla  | Equidae         |
| <i>Equus ferus</i>               | Perissodactyla  | Equidae         |
| <i>Equus grevyi</i>              | Perissodactyla  | Equidae         |
| <i>Equus hemionus</i>            | Perissodactyla  | Equidae         |
| <i>Equus quagga</i>              | Perissodactyla  | Equidae         |
| <i>Equus zebra</i>               | Perissodactyla  | Equidae         |
| <i>Ceratotherium simum</i>       | Perissodactyla  | Rhinocerotidae  |
| <i>Dicerorhinus sumatrensis</i>  | Perissodactyla  | Rhinocerotidae  |
| <i>Diceros bicornis</i>          | Perissodactyla  | Rhinocerotidae  |
| <i>Rhinoceros sondaicus</i>      | Perissodactyla  | Rhinocerotidae  |
| <i>Rhinoceros unicornis</i>      | Perissodactyla  | Rhinocerotidae  |
| <i>Tapirus indicus</i>           | Perissodactyla  | Tapiridae       |
| <i>Tapirus pinchaque</i>         | Perissodactyla  | Tapiridae       |
| <i>Manis javanica</i>            | Pholidota       | Manidae         |
| <i>Phataginus tetradactyla</i>   | Pholidota       | Manidae         |
| <i>Smutsia gigantea</i>          | Pholidota       | Manidae         |
| <i>Bradypus torquatus</i>        | Pilosa          | Bradypodidae    |
| <i>Ateles hybridus</i>           | Primates        | Atelidae        |
| <i>Brachyteles hypoxanthus</i>   | Primates        | Atelidae        |
| <i>Allochrocebus preussi</i>     | Primates        | Cercopithecidae |
| <i>Macaca arctoides</i>          | Primates        | Cercopithecidae |
| <i>Macaca cyclopis</i>           | Primates        | Cercopithecidae |
| <i>Macaca sinica</i>             | Primates        | Cercopithecidae |
| <i>Macaca sylvanus</i>           | Primates        | Cercopithecidae |
| <i>Mandrillus leucophaeus</i>    | Primates        | Cercopithecidae |
| <i>Nasalis larvatus</i>          | Primates        | Cercopithecidae |
| <i>Ptilocolobus badius</i>       | Primates        | Cercopithecidae |
| <i>Ptilocolobus tephrosceles</i> | Primates        | Cercopithecidae |
| <i>Presbytis chrysomelas</i>     | Primates        | Cercopithecidae |
| <i>Rhinopithecus avunculus</i>   | Primates        | Cercopithecidae |
| <i>Rhinopithecus bieti</i>       | Primates        | Cercopithecidae |
| <i>Rhinopithecus roxellana</i>   | Primates        | Cercopithecidae |
| <i>Rhinopithecus strykeri</i>    | Primates        | Cercopithecidae |
| <i>Rungwecebus kipunji</i>       | Primates        | Cercopithecidae |
| <i>Trachypithecus francoisi</i>  | Primates        | Cercopithecidae |
| <i>Trachypithecus vetulus</i>    | Primates        | Cercopithecidae |
| <i>Allocebus trichotis</i>       | Primates        | Cheirogaleidae  |
| <i>Cheirogaleus medius</i>       | Primates        | Cheirogaleidae  |
| <i>Microcebus bongolavensis</i>  | Primates        | Cheirogaleidae  |
| <i>Microcebus griseorufus</i>    | Primates        | Cheirogaleidae  |

|                                     |          |                |
|-------------------------------------|----------|----------------|
| <i>Microcebus jollyae</i>           | Primates | Cheirogaleidae |
| <i>Microcebus murinus</i>           | Primates | Cheirogaleidae |
| <i>Microcebus ravelobensis</i>      | Primates | Cheirogaleidae |
| <i>Microcebus rufus</i>             | Primates | Cheirogaleidae |
| <i>Microcebus tavaratra</i>         | Primates | Cheirogaleidae |
| <i>Mirza coquereli</i>              | Primates | Cheirogaleidae |
| <i>Mirza zaza</i>                   | Primates | Cheirogaleidae |
| <i>Phaner electromontis</i>         | Primates | Cheirogaleidae |
| <i>Phaner furcifer</i>              | Primates | Cheirogaleidae |
| <i>Phaner pallescens</i>            | Primates | Cheirogaleidae |
| <i>Phaner parienti</i>              | Primates | Cheirogaleidae |
| <i>Daubentonia madagascariensis</i> | Primates | Daubentoniidae |
| <i>Galagoides rondoensis</i>        | Primates | Galagidae      |
| <i>Gorilla gorilla</i>              | Primates | Hominidae      |
| <i>Pan troglodytes</i>              | Primates | Hominidae      |
| <i>Pongo abelii</i>                 | Primates | Hominidae      |
| <i>Pongo pygmaeus</i>               | Primates | Hominidae      |
| <i>Hoolock hoolock</i>              | Primates | Hylobatidae    |
| <i>Nomascus concolor</i>            | Primates | Hylobatidae    |
| <i>Nomascus gabriellae</i>          | Primates | Hylobatidae    |
| <i>Nomascus hainanus</i>            | Primates | Hylobatidae    |
| <i>Nomascus leucogenys</i>          | Primates | Hylobatidae    |
| <i>Avahi betsileo</i>               | Primates | Indriidae      |
| <i>Avahi cleesei</i>                | Primates | Indriidae      |
| <i>Avahi laniger</i>                | Primates | Indriidae      |
| <i>Avahi meridionalis</i>           | Primates | Indriidae      |
| <i>Avahi occidentalis</i>           | Primates | Indriidae      |
| <i>Avahi peyrierasi</i>             | Primates | Indriidae      |
| <i>Avahi ramanantsoavanai</i>       | Primates | Indriidae      |
| <i>Avahi unicolor</i>               | Primates | Indriidae      |
| <i>Indri indri</i>                  | Primates | Indriidae      |
| <i>Propithecus candidus</i>         | Primates | Indriidae      |
| <i>Propithecus coquereli</i>        | Primates | Indriidae      |
| <i>Propithecus coronatus</i>        | Primates | Indriidae      |
| <i>Propithecus deckenii</i>         | Primates | Indriidae      |
| <i>Propithecus diadema</i>          | Primates | Indriidae      |
| <i>Propithecus edwardsi</i>         | Primates | Indriidae      |
| <i>Propithecus perrieri</i>         | Primates | Indriidae      |
| <i>Propithecus tattersalli</i>      | Primates | Indriidae      |
| <i>Propithecus verreauxi</i>        | Primates | Indriidae      |
| <i>Eulemur albifrons</i>            | Primates | Lemuridae      |
| <i>Eulemur cinereiceps</i>          | Primates | Lemuridae      |
| <i>Eulemur fulvus</i>               | Primates | Lemuridae      |
| <i>Eulemur mongoz</i>               | Primates | Lemuridae      |
| <i>Eulemur rubriventer</i>          | Primates | Lemuridae      |
| <i>Eulemur rufifrons</i>            | Primates | Lemuridae      |
| <i>Eulemur rufus</i>                | Primates | Lemuridae      |
| <i>Hapalemur aureus</i>             | Primates | Lemuridae      |
| <i>Hapalemur griseus</i>            | Primates | Lemuridae      |

|                                 |             |                     |
|---------------------------------|-------------|---------------------|
| <i>Hapalemur meridionalis</i>   | Primates    | Lemuridae           |
| <i>Hapalemur occidentalis</i>   | Primates    | Lemuridae           |
| <i>Lemur catta</i>              | Primates    | Lemuridae           |
| <i>Prolemur simus</i>           | Primates    | Lemuridae           |
| <i>Varecia variegata</i>        | Primates    | Lemuridae           |
| <i>Lepilemur ahmansonorum</i>   | Primates    | Lepilemuridae       |
| <i>Lepilemur ankaranensis</i>   | Primates    | Lepilemuridae       |
| <i>Lepilemur betsileo</i>       | Primates    | Lepilemuridae       |
| <i>Lepilemur grewcockorum</i>   | Primates    | Lepilemuridae       |
| <i>Lepilemur hollandorum</i>    | Primates    | Lepilemuridae       |
| <i>Lepilemur hubbardorum</i>    | Primates    | Lepilemuridae       |
| <i>Lepilemur jamesorum</i>      | Primates    | Lepilemuridae       |
| <i>Lepilemur leucopus</i>       | Primates    | Lepilemuridae       |
| <i>Lepilemur microdon</i>       | Primates    | Lepilemuridae       |
| <i>Lepilemur milanoii</i>       | Primates    | Lepilemuridae       |
| <i>Lepilemur mustelinus</i>     | Primates    | Lepilemuridae       |
| <i>Lepilemur otto</i>           | Primates    | Lepilemuridae       |
| <i>Lepilemur randrianasoloi</i> | Primates    | Lepilemuridae       |
| <i>Lepilemur seali</i>          | Primates    | Lepilemuridae       |
| <i>Lepilemur wrightae</i>       | Primates    | Lepilemuridae       |
| <i>Palaeopropithecus ingens</i> | Primates    | Palaeopropithecidae |
| <i>Cacajao calvus</i>           | Primates    | Pitheciidae         |
| <i>Xenothrix mcgregori</i>      | Primates    | Pitheciidae         |
| <i>Elephas maximus</i>          | Proboscidea | Elephantidae        |
| <i>Loxodonta africana</i>       | Proboscidea | Elephantidae        |
| <i>Calomys hummelincki</i>      | Rodentia    | Calomyscidae        |
| <i>Castor fiber</i>             | Rodentia    | Castoridae          |
| <i>Chinchilla chinchilla</i>    | Rodentia    | Chinchillidae       |
| <i>Chinchilla lanigera</i>      | Rodentia    | Chinchillidae       |
| <i>Lagostomus crassus</i>       | Rodentia    | Chinchillidae       |
| <i>Handleyomys rhabdops</i>     | Rodentia    | Cricetidae          |
| <i>Juliomys rimofrons</i>       | Rodentia    | Cricetidae          |
| <i>Juscelinomys candango</i>    | Rodentia    | Cricetidae          |
| <i>Kunsia fronto</i>            | Rodentia    | Cricetidae          |
| <i>Megalomys desmarestii</i>    | Rodentia    | Cricetidae          |
| <i>Megalomys luciae</i>         | Rodentia    | Cricetidae          |
| <i>Megaoryzomys curioi</i>      | Rodentia    | Cricetidae          |
| <i>Microtus bavaricus</i>       | Rodentia    | Cricetidae          |
| <i>Nesoryzomys darwini</i>      | Rodentia    | Cricetidae          |
| <i>Nesoryzomys indefessus</i>   | Rodentia    | Cricetidae          |
| <i>Oligoryzomys victus</i>      | Rodentia    | Cricetidae          |
| <i>Oryzomys antillarum</i>      | Rodentia    | Cricetidae          |
| <i>Oryzomys nelsoni</i>         | Rodentia    | Cricetidae          |
| <i>Pennatomys nivalis</i>       | Rodentia    | Cricetidae          |
| <i>Reithrodontomys microdon</i> | Rodentia    | Cricetidae          |
| <i>Rheomys mexicanus</i>        | Rodentia    | Cricetidae          |
| <i>Thomasomys incanus</i>       | Rodentia    | Cricetidae          |
| <i>Allactaga tetradactyla</i>   | Rodentia    | Dipodidae           |
| <i>Boromys offella</i>          | Rodentia    | Echimyidae          |

|                                   |          |            |
|-----------------------------------|----------|------------|
| <i>Boromys torrei</i>             | Rodentia | Echimyidae |
| <i>Brotomys voratus</i>           | Rodentia | Echimyidae |
| <i>Capromys pilorides</i>         | Rodentia | Echimyidae |
| <i>Geocapromys brownii</i>        | Rodentia | Echimyidae |
| <i>Geocapromys columbianus</i>    | Rodentia | Echimyidae |
| <i>Heteropsomys insulans</i>      | Rodentia | Echimyidae |
| <i>Hexolobodon phenax</i>         | Rodentia | Echimyidae |
| <i>Isolobodon montanus</i>        | Rodentia | Echimyidae |
| <i>Isolobodon portoricensis</i>   | Rodentia | Echimyidae |
| <i>Mesocapromys angelcabrerai</i> | Rodentia | Echimyidae |
| <i>Mesocapromys nanus</i>         | Rodentia | Echimyidae |
| <i>Mysateles melanurus</i>        | Rodentia | Echimyidae |
| <i>Phyllomys brasiliensis</i>     | Rodentia | Echimyidae |
| <i>Plagiodontia aedium</i>        | Rodentia | Echimyidae |
| <i>Plagiodontia ipnaeum</i>       | Rodentia | Echimyidae |
| <i>Trinomys eliasi</i>            | Rodentia | Echimyidae |
| <i>Myomimus roachi</i>            | Rodentia | Gliridae   |
| <i>Apodemus sylvaticus</i>        | Rodentia | Muridae    |
| <i>Apomys camiguinensis</i>       | Rodentia | Muridae    |
| <i>Apomys gracilirostris</i>      | Rodentia | Muridae    |
| <i>Conilurus albipes</i>          | Rodentia | Muridae    |
| <i>Conilurus capricornensis</i>   | Rodentia | Muridae    |
| <i>Coryphomys buehleri</i>        | Rodentia | Muridae    |
| <i>Crateromys heaneyi</i>         | Rodentia | Muridae    |
| <i>Hapalomys longicaudatus</i>    | Rodentia | Muridae    |
| <i>Leporillus apicalis</i>        | Rodentia | Muridae    |
| <i>Leporillus conditor</i>        | Rodentia | Muridae    |
| <i>Melomys aerosus</i>            | Rodentia | Muridae    |
| <i>Melomys fraterculus</i>        | Rodentia | Muridae    |
| <i>Mesembriomys gouldii</i>       | Rodentia | Muridae    |
| <i>Mesembriomys macrurus</i>      | Rodentia | Muridae    |
| <i>Mus fragilicauda</i>           | Rodentia | Muridae    |
| <i>Mus musculus</i>               | Rodentia | Muridae    |
| <i>Nesoromys ceramicus</i>        | Rodentia | Muridae    |
| <i>Niviventer cremoriventer</i>   | Rodentia | Muridae    |
| <i>Notomys alexis</i>             | Rodentia | Muridae    |
| <i>Notomys amplus</i>             | Rodentia | Muridae    |
| <i>Notomys cervinus</i>           | Rodentia | Muridae    |
| <i>Notomys fuscus</i>             | Rodentia | Muridae    |
| <i>Notomys longicaudatus</i>      | Rodentia | Muridae    |
| <i>Notomys macrotis</i>           | Rodentia | Muridae    |
| <i>Notomys mitchellii</i>         | Rodentia | Muridae    |
| <i>Notomys mordax</i>             | Rodentia | Muridae    |
| <i>Notomys robustus</i>           | Rodentia | Muridae    |
| <i>Otomys lacustris</i>           | Rodentia | Muridae    |
| <i>Palawanomys furvus</i>         | Rodentia | Muridae    |
| <i>Paulamys naso</i>              | Rodentia | Muridae    |
| <i>Praomys degraaffi</i>          | Rodentia | Muridae    |
| <i>Pseudomys albocinereus</i>     | Rodentia | Muridae    |

|                                   |          |            |
|-----------------------------------|----------|------------|
| <i>Pseudomys australis</i>        | Rodentia | Muridae    |
| <i>Pseudomys bolami</i>           | Rodentia | Muridae    |
| <i>Pseudomys chapmani</i>         | Rodentia | Muridae    |
| <i>Pseudomys fieldi</i>           | Rodentia | Muridae    |
| <i>Pseudomys glaucus</i>          | Rodentia | Muridae    |
| <i>Pseudomys gouldii</i>          | Rodentia | Muridae    |
| <i>Pseudomys nanus</i>            | Rodentia | Muridae    |
| <i>Pseudomys novaehollandiae</i>  | Rodentia | Muridae    |
| <i>Pseudomys occidentalis</i>     | Rodentia | Muridae    |
| <i>Pseudomys oralis</i>           | Rodentia | Muridae    |
| <i>Pseudomys shortridgei</i>      | Rodentia | Muridae    |
| <i>Rattus hainaldi</i>            | Rodentia | Muridae    |
| <i>Rattus macleari</i>            | Rodentia | Muridae    |
| <i>Rattus nativitatis</i>         | Rodentia | Muridae    |
| <i>Rattus norvegicus</i>          | Rodentia | Muridae    |
| <i>Rattus praetor</i>             | Rodentia | Muridae    |
| <i>Rattus ranjinae</i>            | Rodentia | Muridae    |
| <i>Rattus rattus</i>              | Rodentia | Muridae    |
| <i>Rattus satarae</i>             | Rodentia | Muridae    |
| <i>Rattus stoicus</i>             | Rodentia | Muridae    |
| <i>Rattus villosissimus</i>       | Rodentia | Muridae    |
| <i>Solomys sapientis</i>          | Rodentia | Muridae    |
| <i>Tokudaia muenninki</i>         | Rodentia | Muridae    |
| <i>Tokudaia osimensis</i>         | Rodentia | Muridae    |
| <i>Zyomys pedunculatus</i>        | Rodentia | Muridae    |
| <i>Brachytarsomys albicauda</i>   | Rodentia | Nesomyidae |
| <i>Brachytarsomys villosa</i>     | Rodentia | Nesomyidae |
| <i>Brachyuromys betsileoensis</i> | Rodentia | Nesomyidae |
| <i>Brachyuromys ramirohitra</i>   | Rodentia | Nesomyidae |
| <i>Eliurus carletoni</i>          | Rodentia | Nesomyidae |
| <i>Eliurus grandidieri</i>        | Rodentia | Nesomyidae |
| <i>Eliurus majori</i>             | Rodentia | Nesomyidae |
| <i>Eliurus minor</i>              | Rodentia | Nesomyidae |
| <i>Eliurus myoxinus</i>           | Rodentia | Nesomyidae |
| <i>Eliurus petteri</i>            | Rodentia | Nesomyidae |
| <i>Eliurus tanala</i>             | Rodentia | Nesomyidae |
| <i>Eliurus webbi</i>              | Rodentia | Nesomyidae |
| <i>Hypogeomys antimena</i>        | Rodentia | Nesomyidae |
| <i>Macrotarsomys ingens</i>       | Rodentia | Nesomyidae |
| <i>Monticolomys koopmani</i>      | Rodentia | Nesomyidae |
| <i>Mystromys albicaudatus</i>     | Rodentia | Nesomyidae |
| <i>Nesomys audeberti</i>          | Rodentia | Nesomyidae |
| <i>Nesomys lambertoni</i>         | Rodentia | Nesomyidae |
| <i>Nesomys rufus</i>              | Rodentia | Nesomyidae |
| <i>Voalavo antsahabensis</i>      | Rodentia | Nesomyidae |
| <i>Voalavo gymnocaudus</i>        | Rodentia | Nesomyidae |
| <i>Marmota vancouverensis</i>     | Rodentia | Sciuridae  |
| <i>Petinomys genibarbis</i>       | Rodentia | Sciuridae  |
| <i>Petinomys setosus</i>          | Rodentia | Sciuridae  |

|                                  |            |           |
|----------------------------------|------------|-----------|
| <i>Petinomys vordermanni</i>     | Rodentia   | Sciuridae |
| <i>Pteromyscus pulverulentus</i> | Rodentia   | Sciuridae |
| <i>Sciurus vulgaris</i>          | Rodentia   | Sciuridae |
| <i>Spermophilus citellus</i>     | Rodentia   | Sciuridae |
| <i>Urocitellus brunneus</i>      | Rodentia   | Sciuridae |
| <i>Tupaia palawanensis</i>       | Scandentia | Tupaidae  |
